# Supplementary material for: Mitigation of SARS-CoV-2 transmission at a large public university
Source: PubMed Central journal article supplement (PMC9184485; doi:10.1038/s41467-022-30833-3), 2022-06-09
Supplement: 41467_2022_30833_MOESM1_ESM.pdf [file 41467_2022_30833_MOESM1_ESM.pdf]

## Supplementary Figure Legends

**Supplementary Fig. 1.** The effect of different mitigation interventions on the basic reproduction number  $R_0$  as computed in our agent-based model assuming that 60% agents are compliant with testing, isolation and quarantine. If  $R_0$  is greater than one (orange dashed line at  $R_0=1$ ), the epidemic grows exponentially. Mean  $R_0$  values ( $n=10$ ) are indicated for each conditions tested. Error bars represent SEM.

**Supplementary Fig. 2.** Effect of delays in contact tracing on estimated total number of infections and the peak size of quarantined population. Heat maps for the expected number of infected cases and maximal quarantined agents by the end of the semester as a function of delayed time to notify contacts (x-axis) and the fraction of contacts that is untraceable (y-axis). Delays in notification aggregate from delays in isolation of the index case, delays in completion of case investigation, and delays in establishing a successful contact with the exposed individual. The fraction of untraceable contacts needs to be small (<30%) in order for contact tracing to be effective. Delays of more than 1 day to notify the results and contacts can lead to multifold increase in epidemic size and quarantined population. For example, notifying positive cases within 1 day of positive result and instantaneous contact tracing lead to 1000 infected agents. A two-day delay in notifying the positive cases and for 30% of untraceable contacts, the total number of infected agents may increase by tenfold.

**Supplementary Fig. 3.** Limit of Detection (LoD) for assessment of SARS-CoV-2 nucleic acid from saliva, comparing the initial protocol performed on QuantStudio 3 (**a**) to the covidSHIELD protocol performed either on QuantStudio 7Flex (**b**) or QuantStudio 7Pro (**c**). Saliva in 50mL conical tubes was spiked with the indicated amount of gamma-irradiated SARS-CoV-2 prior to heating at 95°C for 30 minutes. Samples were processed using the covidSHIELD assay. PCR plates were run on 3 different QuantStudio models together with a positive control (pos; SARS-CoV-2 positive control,  $5.0 \times 10^3$  copies/mL) and a negative control (neg; water). Data in quadruplicates were analyzed for SARS-CoV-2 *ORF1ab* (blue triangle), *N*-gene (orange square), and *S*-gene (green circle), and MS2 (open circle). MS2 bacteriophage was added to the PCR reaction mix as internal control. Undetermined Ct values are plotted as ND. The LoD was set at the lowest concentration at which 2 out of 3 viral target genes were detected. LoD experiments were performed at least five times in different machines.

**Supplementary Fig. 4.** Saliva samples could be stored at room temperature for at least 7 days prior to heating and analysis without loss of sensitivity. Saliva from a SARS-CoV-2 negative subject was collected in 50 mL conical tubes. Sample was divided into sets of aliquots (one set for the negative samples and one for the positive sample). The positive samples were created by spiking the saliva with  $\gamma$ -irradiated SARS-CoV-2 at  $5.0 \times 10^3$  viral copies/mL. Samples were further split into smaller groups for storage at either room temperature (25°C) or at 4°C at different time points. Following the incubation period, all samples were processed using the covidSHIELD assay, and together with a positive control (pos; SARS-CoV-2 positive control,  $5.0 \times 10^3$  copies/mL) and a negative control (neg; water), were directly analyzed by RT-qPCR in triplicates for SARS-CoV-2 *ORF1ab* (blue triangle), *N*-gene (orange square), and *S*-gene (green circle), and MS2

(open circle). MS2 bacteriophage was added to the PCR reaction mix as internal control. Undetermined Ct values are plotted at 0. Saliva stability experiment prior to heat inactivation was repeated twice.

**Supplementary Fig. 5.** LOD of direct saliva-to-RT-qPCR SARS-CoV-2 nucleic acid detection using CDC-approved primers and probes.  $\gamma$ -irradiated SARS-CoV-2 was spiked into fresh human saliva (SARS-CoV-2 negative) in 1X Tris-Borate-EDTA buffer (TBE) at  $1.0 \times 10^2$ ,  $5.0 \times 10^2$ ,  $1.0 \times 10^3$ ,  $2.5 \times 10^3$ ,  $5.0 \times 10^3$ ,  $1.0 \times 10^4$ , and  $5.0 \times 10^4$  viral copies/mL. Samples were incubated at 95°C for 30 min. Virus-spiked saliva samples, a positive control (pos; SARS-CoV-2 positive control,  $5.0 \times 10^3$  copies/mL) and a negative control (neg; water) were directly analyzed by RT-qPCR, in triplicate, for SARS-CoV-2 N1 gene (a) and N2 gene (b), and the human RP gene (c). Undetermined Ct values are plotted at 0. LoD experiments using CDC primers were performed at least three times.

**Supplementary Fig. 6.** Comparison of covidSHIELD processing method (a, heat at 95°C for 30 minutes followed by TBE/tween addition) to SalivaDirect protocol (b, proteinase K treatment followed by heating at 95°C for 5 minutes).  $\gamma$ -irradiated SARS-CoV-2 was spiked into fresh human saliva (SARS-CoV-2 negative). All samples were analyzed with the ThermoFisher TaqPath COVID-19 combo kit on a QS7 instrument in triplicates together with a positive control (pos; SARS-CoV-2 positive control,  $5.0 \times 10^3$  copies/mL) and a negative control (neg; water). MS2 bacteriophage was added to the PCR reaction mix as internal control. This experiment was performed twice.

**Supplementary Fig. 7.** Distribution of time interval between two consecutive tests. The distribution has a mean of 4.14 days and standard deviation of 3.4 days. The probability of a test interval larger than 7 days was 0.11. 62% of the tests were spaced at 3.5 days or less. This suggests that about 60% of the campus population was highly compliant with the testing protocol while the rest was somewhat compliant and only a small fraction was significantly out of compliance (inter-test time > 7 days).

**Supplementary Fig. 8.** 7-day rolling average for daily positive cases as computed using the agent-based model assuming different levels of compliance with isolation and quarantine compared to the confirmed cases detected using covidShield test as of October 15, 2020. (a) Trajectory of cases assuming an average rate of imported infections = 2 cases/day, (b) Trajectory of cases assuming an average rate of imported infections = 6 cases/day, and (c) Trajectory of cases assuming an average rate of imported infections = 10 cases/day. Compliance of the cohort of agents with high social activity levels (e.g., those who attend parties and go to bars) was assumed to be 0% prior to the temporary restrictions (essential activities) period. During the essential activity period, simulated agents are allowed to go to classes, restaurants, libraries, and coffee shops but not to attend bars and parties. Imported infections are introduced to account for incidental infections in the university population due to interaction with the surrounding community which has its own prevalence. The results suggest that the large increase in cases in the beginning of the semester may be explained as a combination of lack of compliance with isolation and quarantine and high levels of imported infections (> 10 cases/day, Panel c). The essential activities period helped contain the spread and led to rapid decline in cases. The model estimates

that student compliance during this period was relatively high ranging between 60%-80% (2 daily imported infections, Panel **a**), 80% ( 6 daily imported infections, Panel **b**), and close to 100% (10 daily imported infections, Panel **c**). After the temporary restrictions ended, the inferred compliance levels, required to match the observed cases, varied but was estimated to be between 40% and 60% with the lower end more probable if imported infections = 2 cases/day and the upper end is more probable if imported infections = 10 cases/day. Between 08/15/2020 and 10/01/2020, and assuming only 25%-50% of covid cases were detected and reported at the state level, the estimated 7-day prevalence in the state of Illinois ranged between 0.22% and 0.33%. For the socially active agent population (approximately 15,000 agents), this corresponds to imported infections ranging between 4.7 cases/day and 9 cases/day consistent with the estimates in Panels **b** and **c**. These results suggest that compliance levels with isolation and quarantine were close to 60%, the essential activities period was successful in quickly limiting the spread and higher level of compliance during that period further assisted with this, and community transmission as measured by imported infection is an important confounder in shaping the epidemic curve.

**Supplementary Fig. 9.** Estimating the effective exponential decay rate that was achieved by Shield during different intervals of Fall 2021. **(a)** Daily new cases by date of sample collection. **(b)** The natural logarithm of the 7-day averaged daily new cases. The slope of the dashed line  $g$  measures the effective exponential decay rate in the intervals over which cases were decreasing. The exponential decay rate ranged between  $g = -0.126/\text{day}$  (halving time = 5.5.days) to  $g = -0.057/\text{day}$  (halving time = 12.1 days). Assuming a serial time interval that is gamma distributed with a mean = 4 days and standard deviation = 3.25 days, these decay rates correspond to an effective reproduction number<sup>48</sup> that ranges between 0.55 and 0.78. These estimates are consistent with the full time-dependent trajectories displayed in Figure 3 in the main text which demonstrate that  $R_t$  reached as low as 0.5, and was frequently around 0.75-0.85.

**Supplementary Fig. 10.** Measured correlations of the number of 7-day averaged daily new cases between residents in Champaign County, faculty/staff, and undergraduate students for the period between August 15 and December 23. All points in three scatter plots are colored according to their dates, as shown in the color bar on the right. **(a)** The number of 7-day averaged daily new cases of residents in Champaign county strongly correlated with that of faculty/staff especially for the period after October 18 (Pearson correlation coefficient 0.86, p-value  $7.99 \times 10^{-38}$  calculated using a 2-tailed test). **(b)** At the beginning of the semester (around August 31) when there was a spike in daily new cases from undergraduate students, it had little influence on the faculty/staff. While at the late period of the semester (after October 18) when the case positivity in Illinois increased, they showed a correlation (Pearson correlation coefficient 0.88, p-value  $1.33 \times 10^{-21}$  calculated using a 2-tailed test). **(c)** The initial spike in the number of daily new cases of undergraduate students doesn't correlate with that of residents in Champaign County. While at the late period of the semester (after October 18), as the number of positive cases in Champaign county increased and then decreased, the number of cases of undergraduate students also showed a similar trend.

## Supplementary Tables

**Supplementary Table 1.** Comparison of Ct values from 25 clinical samples that were split into two aliquots upon receipt, one set was processed using our covidSHIELD assay and the other set was subjected to RNA extraction using MagMax Viral/Pathogen II (MVP II) Nucleic Acid Isolation Kit (ThermoFisher).

**Supplementary Table 2.** Comparison of method of loading to the 384-well PCR plate (manual vs. multichannel robot) and the method of loading heat-inactivated saliva samples to the 96-deep-well plates pre-loaded with 2xTBE/1% Tween-20 buffer (manual vs. Span8 robot).

**Supplementary Table 3.** Endogenous & Exogenous Interference testing results for covidSHIELD assay

**Supplementary Table 4.** Qualitative outcome of parallel testing of paired mid-turbinate swabs and saliva with the Abbott RealTime SARS-CoV-2 assay and covidSHIELD.

**Supplementary Table 5.** Method comparison study completed to support the correlation between saliva samples processed with covidSHIELD and nasal samples processed with Abbott RealTime SARS-CoV-2 assay performed on the Abbott m2000 System.

**Supplementary Table 6.** Details to Capture on Case Report Form

**Supplementary Table 7.** Comparison of mid-turbinate (MT) swab and saliva from 17 individuals identified with low viral load based on MT swab analyzed using Abbott Alinity RT-PCR.

**Supplementary Table 8.** Quanta emission rates, and ventilation rates in different zone types. How many zones in each type is given in the “Count” column.

**Supplementary Table 9:** Assumption for how long agents stay in different zones.

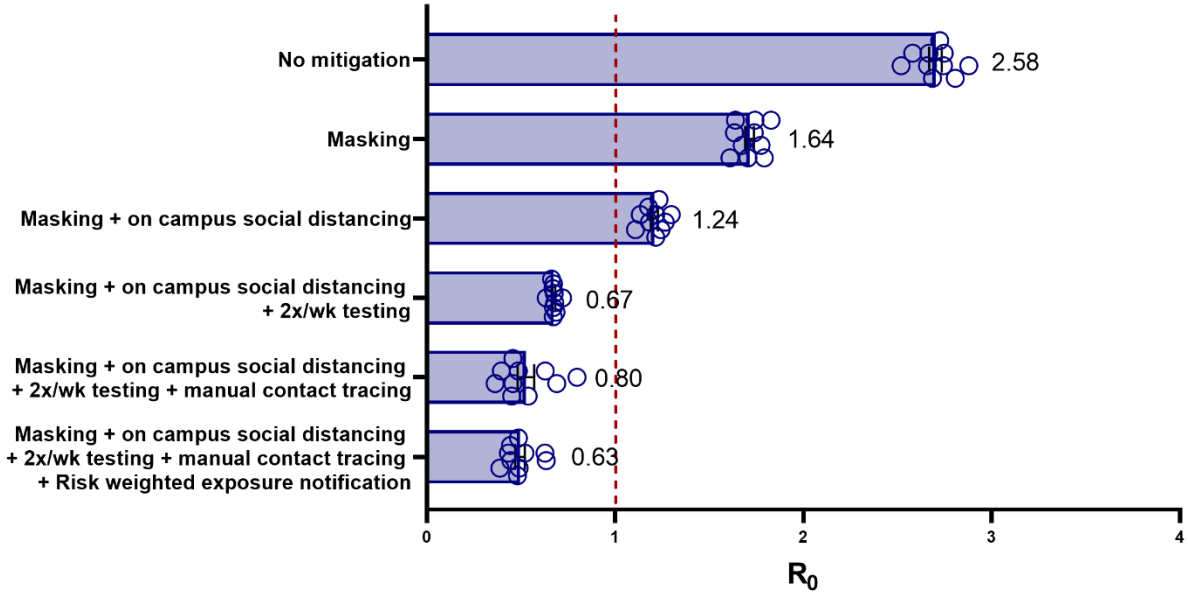

**Supplementary Fig. 1.** The effect of different mitigation interventions on the basic reproduction number  $R_0$  as computed in our agent-based model assuming that 60% agents are compliant with testing, isolation and quarantine. If  $R_0$  is greater than one (orange dashed line at  $R_0=1$ ), the epidemic grows exponentially. Mean  $R_0$  values ( $n=10$ ) are indicated for each conditions tested. Error bars represent SEM.

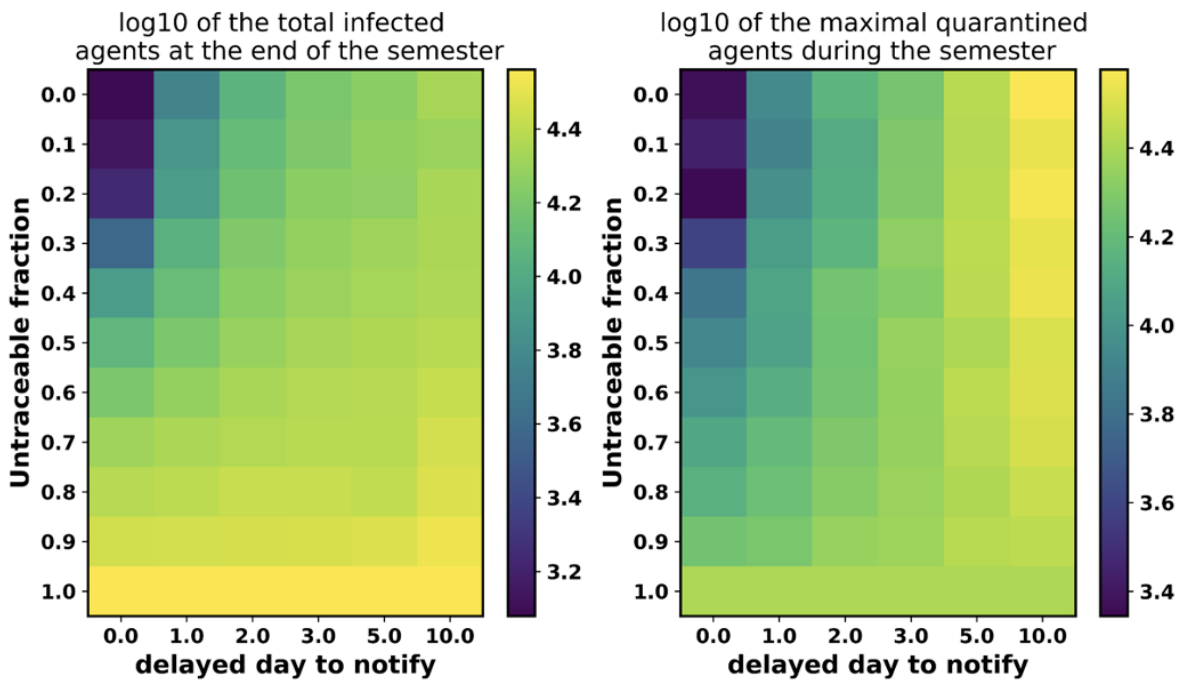

**Supplementary Fig. 2.** Effect of delays in contact tracing on estimated total number of infections and the peak size of quarantined population. Heat maps for the expected number of infected cases and maximal quarantined agents by the end of the semester as a function of delayed time to notify contacts (x-axis) and the fraction of contacts that is untraceable (y-axis). Delays in notification aggregate from delays in isolation of the index case, delays in completion of case investigation, and delays in establishing a successful contact with the exposed individual. The fraction of untraceable contacts needs to be small (<30%) in order for contact tracing to be effective. Delays of more than 1 day to notify the results and contacts can lead to multifold increase in epidemic size and quarantined population. For example, notifying positive cases within 1 day of positive result and instantaneous contact tracing lead to 1000 infected agents. A two-day delay in notifying the positive cases and for 30% of untraceable contacts, the total number of infected agents may increase by tenfold.

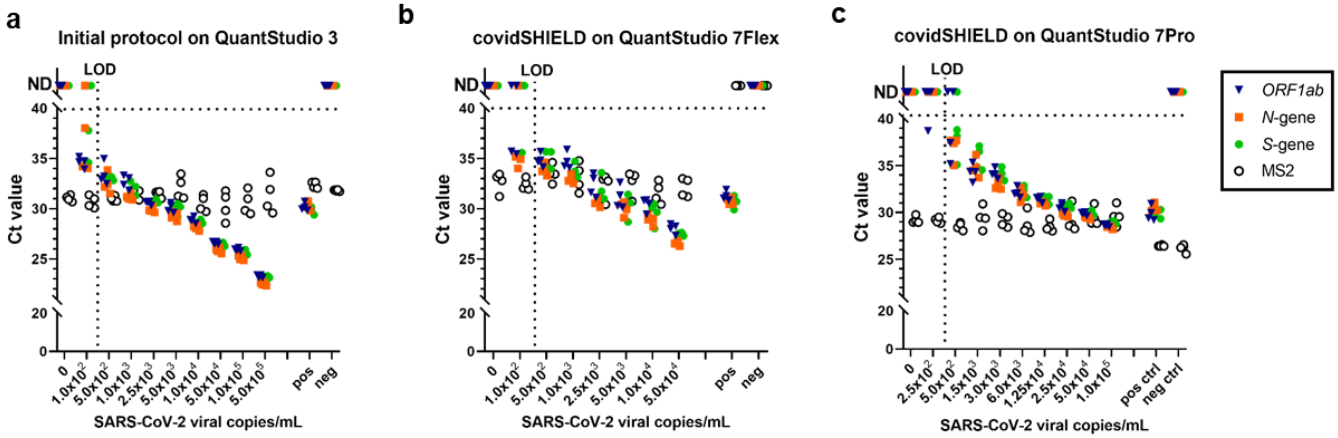

**Supplementary Fig. 3.** Limit of Detection (LoD) for assessment of SARS-CoV-2 nucleic acid from saliva, comparing the initial protocol performed on QuantStudio 3 (a) to the covidSHIELD protocol performed either on QuantStudio 7Flex (b) or QuantStudio 7Pro (c). Saliva in 50mL conical tubes was spiked with the indicated amount of gamma-irradiated SARS-CoV-2 prior to heating at 95°C for 30 minutes. Samples were processed using the covidSHIELD assay. PCR plates were run on 3 different QuantStudio models together with a positive control (pos; SARS-CoV-2 positive control, 5.0x10<sup>3</sup> copies/mL) and a negative control (neg; water). Data in quadruplicates were analyzed for SARS-CoV-2 *ORF1ab* (blue triangle), *N*-gene (orange square), and *S*-gene (green circle), and MS2 (open circle). MS2 bacteriophage was added to the PCR reaction mix as internal control. Undetermined Ct values are plotted as ND. The LoD was set at the lowest concentration at which 2 out of 3 viral target genes were detected. LoD experiments were performed at least five times in different machines.

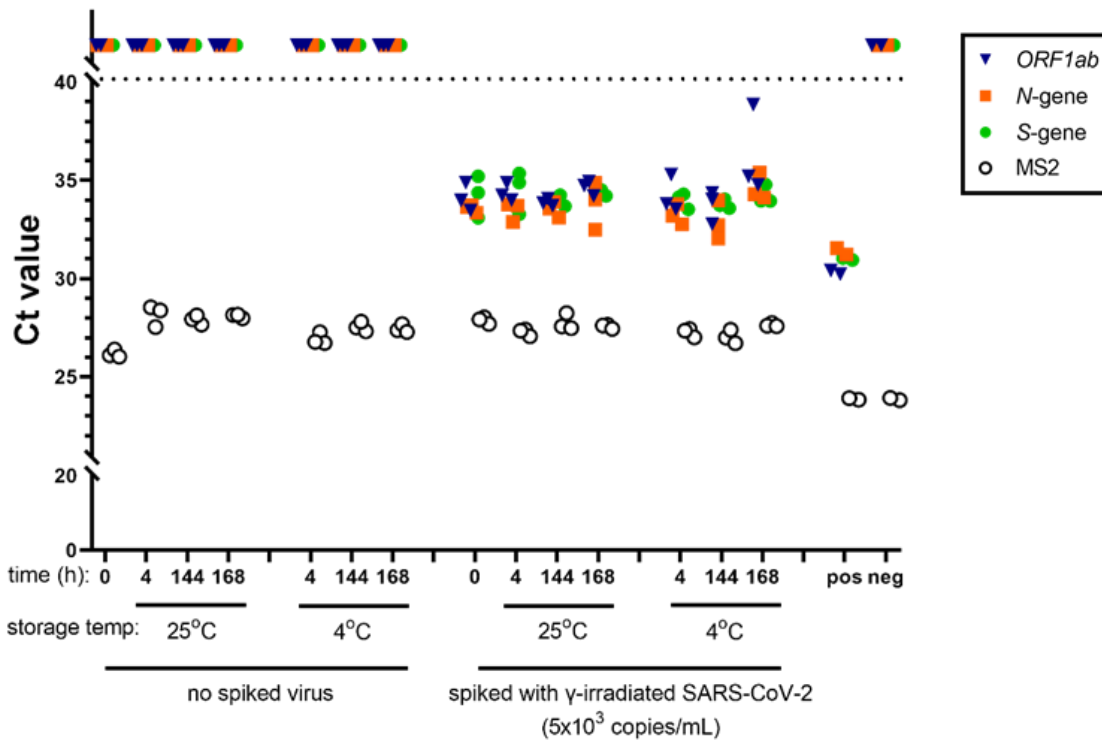

**Supplementary Fig. 4.** Saliva samples could be stored at room temperature for at least 7 days prior to heating and analysis without loss of sensitivity. Saliva from a SARS-CoV-2 negative subject was collected in 50 mL conical tubes. Sample was divided into sets of aliquots (one set for the negative samples and one for the positive sample). The positive samples were created by spiking the saliva with  $\gamma$ -irradiated SARS-CoV-2 at  $5.0 \times 10^3$  viral copies/mL. Samples were further split into smaller groups for storage at either room temperature (25°C) or at 4°C at different time points. Following the incubation period, all samples were processed using the covidSHIELD assay, and together with a positive control (pos; SARS-CoV-2 positive control,  $5.0 \times 10^3$  copies/mL) and a negative control (neg; water), were directly analyzed by RT-qPCR in triplicates for SARS-CoV-2 *ORF1ab* (blue triangle), *N-gene* (orange square), and *S-gene* (green circle), and MS2 (open circle). MS2 bacteriophage was added to the PCR reaction mix as internal control. Undetermined Ct values are plotted as ND. Saliva stability experiment prior to heat inactivation was repeated twice.



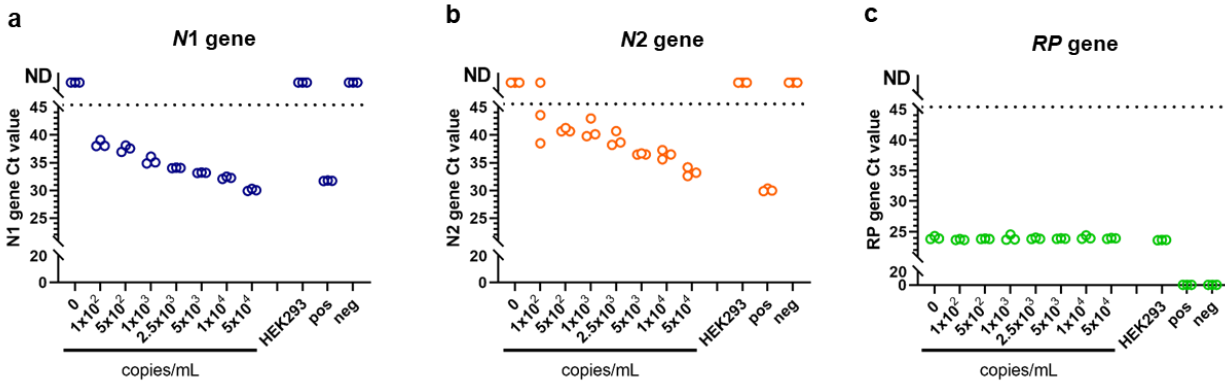

**Supplementary Fig. 5.** LOD of direct saliva-to-RT-qPCR SARS-CoV-2 nucleic acid detection using CDC-approved primers and probes.  $\gamma$ -irradiated SARS-CoV-2 was spiked into fresh human saliva (SARS-CoV-2 negative) in 1X Tris-Borate-EDTA buffer (TBE) at  $1.0 \times 10^2$ ,  $5.0 \times 10^2$ ,  $1.0 \times 10^3$ ,  $2.5 \times 10^3$ ,  $5.0 \times 10^3$ ,  $1.0 \times 10^4$ , and  $5.0 \times 10^4$  viral copies/mL. Samples were incubated at  $95^\circ\text{C}$  for 30 min. Virus-spiked saliva samples, a positive control (pos; SARS-CoV-2 positive control,  $5.0 \times 10^3$  copies/mL) and a negative control (neg; water) were directly analyzed by RT-qPCR, in triplicate, for SARS-CoV-2 *N1* gene (a) and *N2* gene (b), and the human RP gene (c). Undetermined Ct values are plotted as ND. LoD experiments using CDC primers were performed at least three times.

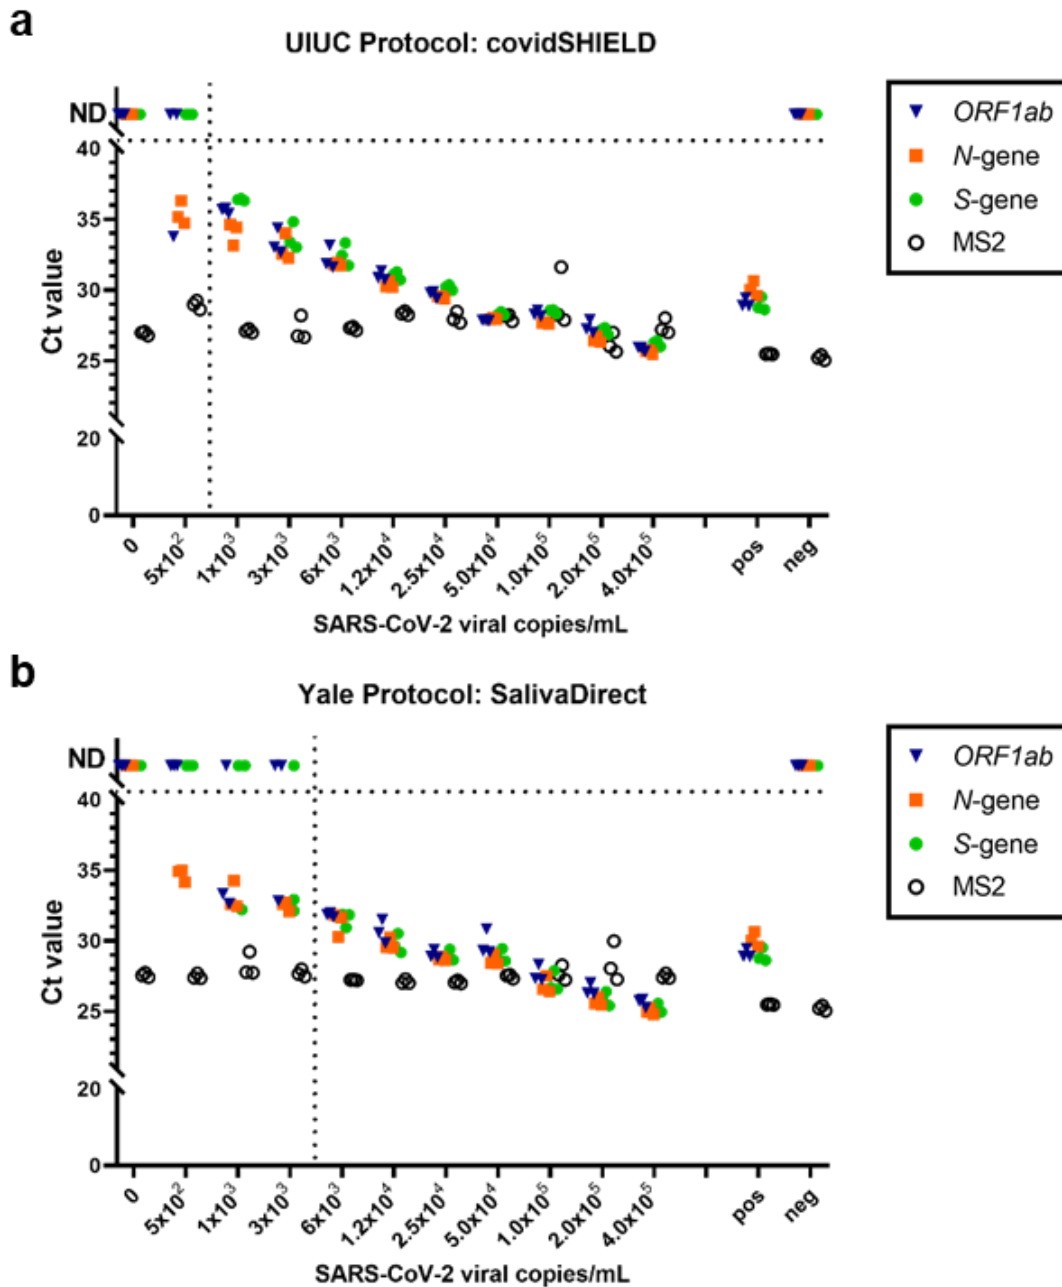

**Supplementary Fig. 6.** Comparison of covidSHIELD processing method (**a**, heat at 95°C for 30 minutes followed by TBE/tween addition) to SalivaDirect protocol (**b**, proteinase K treatment followed by heating at 95°C for 5 minutes).  $\gamma$ -irradiated SARS-CoV-2 was spiked into fresh human saliva (SARS-CoV-2 negative). All samples were analyzed with the ThermoFisher TaqPath COVID-19 combo kit on a QS7 instrument in triplicates together with a positive control (pos; SARS-CoV-2 positive control,  $5.0 \times 10^3$  copies/mL) and a negative control (neg; water). MS2 bacteriophage was added to the PCR reaction mix as internal control. This experiment was performed twice.

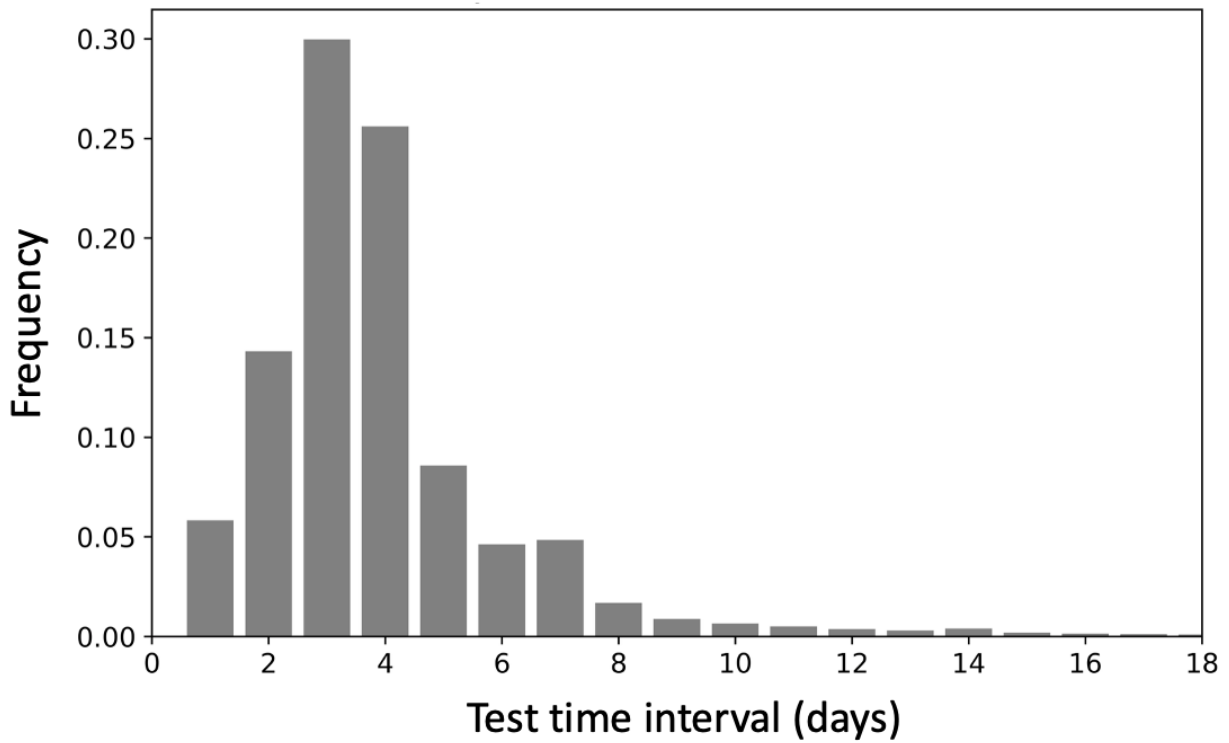

**Supplementary Fig. 7.** Distribution of time interval between two consecutive tests. The distribution has a mean of 4.14 days and standard deviation of 3.4 days. The probability of a test interval larger than 7 days was 0.11. 62% of the tests were spaced at 3.5 days or less. This suggests that about 60% of the campus population was highly compliant with the testing protocol while the rest was somewhat compliant and only a small fraction was significantly out of compliance (inter-test time > 7 days).

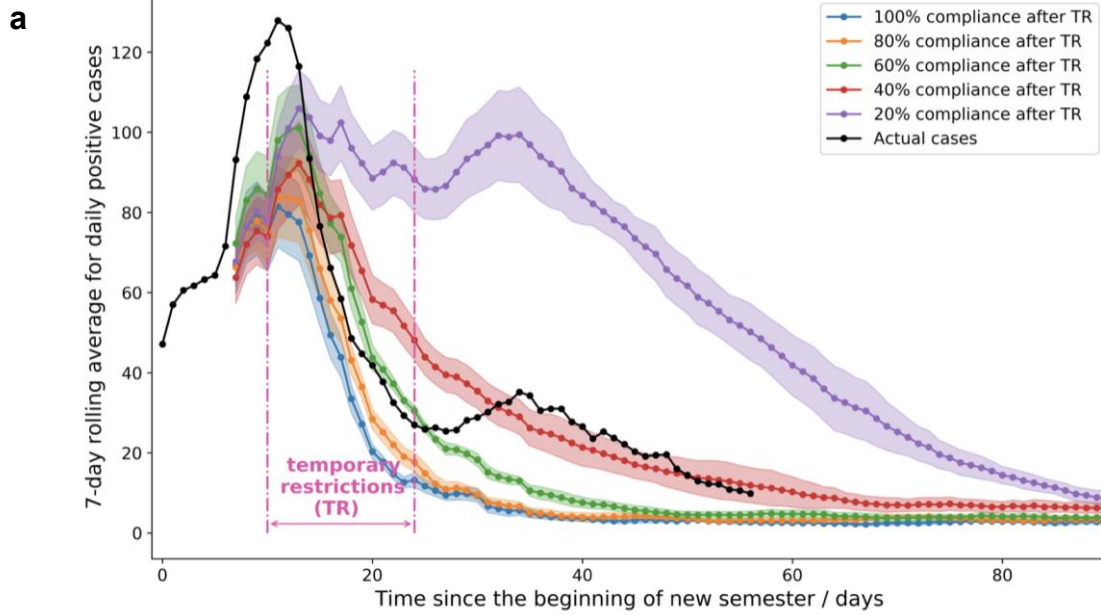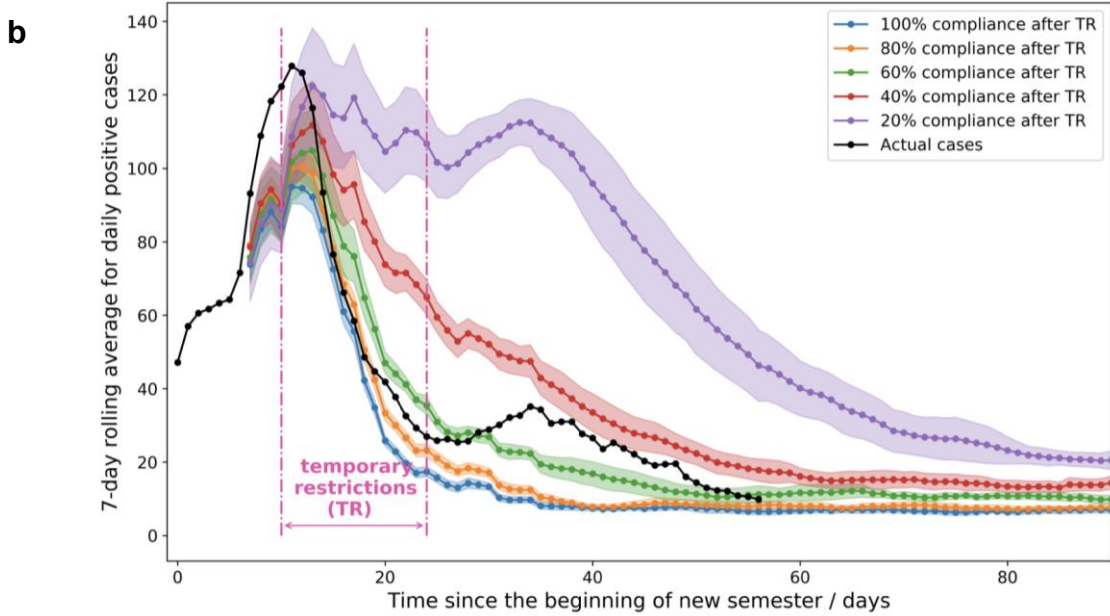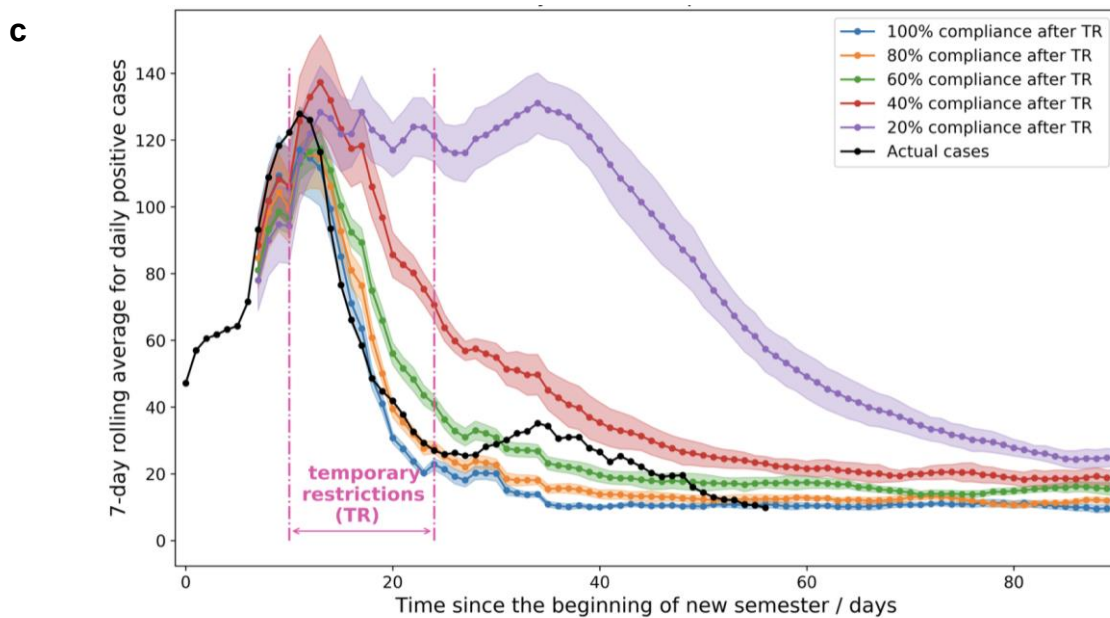

**Supplementary Fig. 8.** 7-day rolling average for daily positive cases as computed using the agent-based model assuming different levels of compliance with isolation and quarantine compared to the confirmed cases detected using covidShield test as of October 15, 2020. (a) Trajectory of cases assuming an average rate of imported infections = 2 cases/day, (b) Trajectory of cases assuming an average rate of imported infections = 6 cases/day, and (c) Trajectory of cases assuming an average rate of imported infections = 10 cases/day. Compliance of the cohort of agents with high social activity levels (e.g., those who attend parties and go to bars) was assumed to be 0% prior to the temporary restrictions (essential activities) period. During the essential activity period, simulated agents are allowed to go to classes, restaurants, libraries, and coffee shops but not to attend bars and parties. Imported infections are introduced to account for incidental infections in the university population due to interaction with the surrounding community which has its own prevalence. The results suggest that the large increase in cases in the beginning of the semester may be explained as a combination of lack of compliance with isolation and quarantine and high levels of imported infections (> 10 cases/day, Panel c). The essential activities period helped contain the spread and led to rapid decline in cases. The model estimates that student compliance during this period was relatively high ranging between 60%-80% (2 daily imported infections, Panel a), 80% ( 6 daily imported infections, Panel b), and close to 100% (10 daily imported infections, Panel c). After the temporary restrictions ended, the inferred compliance levels, required to match the observed cases, varied but was estimated to be between 40% and 60% with the lower end more probable if imported infections = 2 cases/day and the upper end is more probable if imported infections = 10 cases/day. Between 08/15/2020 and 10/01/2020, and assuming only 25%-50% of covid cases were detected and reported at the state level, the estimated 7-day prevalence in the state of Illinois ranged between 0.22% and 0.33%. For the socially active agent population (approximately 15,000 agents), this corresponds to imported infections ranging between 4.7 cases/day and 9 cases/day consistent with the estimates in Panels b and c. These results suggest that compliance levels with isolation and quarantine were close to 60%, the essential activities period was successful in quickly limiting the spread and higher level of compliance during that period further assisted with this, and community transmission as measured by imported infection is an important confounder in shaping the epidemic curve.

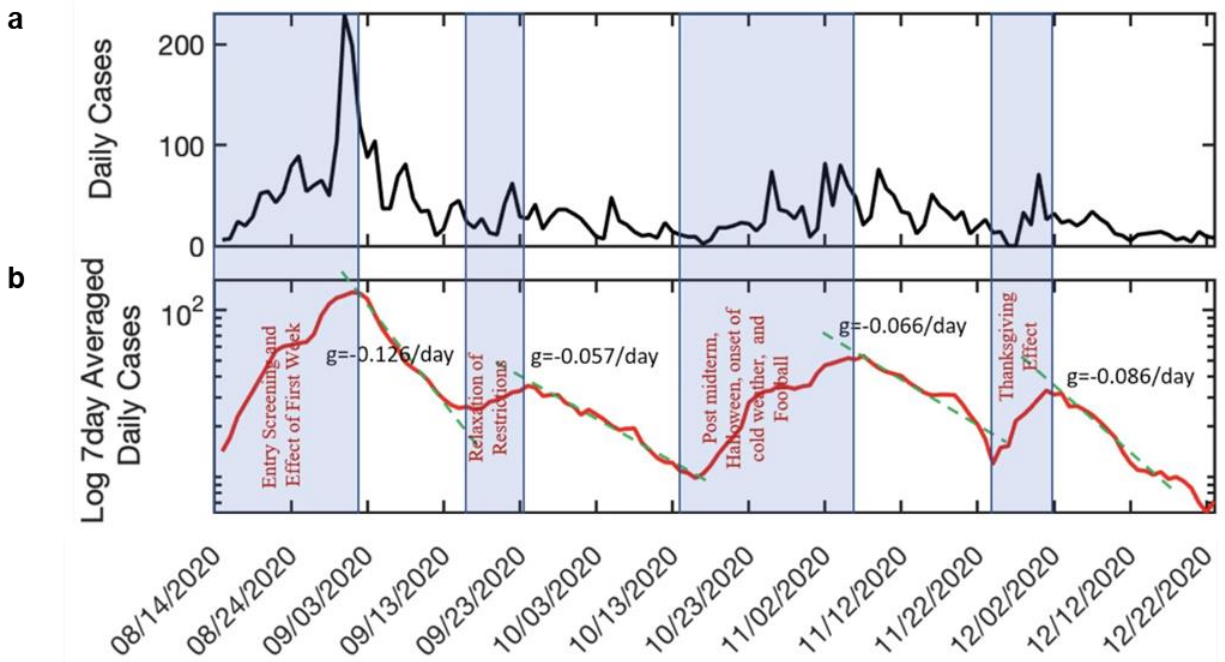

**Supplementary Fig. 9.** Estimating the effective exponential decay rate that was achieved by Shield during different intervals of Fall 2021. **(a)** Daily new cases by date of sample collection. **(b)** The natural logarithm of the 7-day averaged daily new cases. The slope of the dashed line  $g$  measures the effective exponential decay rate in the intervals over which cases were decreasing. The exponential decay rate ranged between  $g = -0.126/\text{day}$  (halving time = 5.5 days) to  $g = -0.057/\text{day}$  (halving time = 12.1 days). Assuming a serial time interval that is gamma distributed with a mean = 4 days and standard deviation = 3.25 days, these decay rates correspond to an effective reproduction number<sup>48</sup> that ranges between 0.55 and 0.78. These estimates are consistent with the full time-dependent trajectories displayed in Figure 3 in the main text which demonstrate that  $R_t$  reached as low as 0.5, and was frequently around 0.75-0.85.

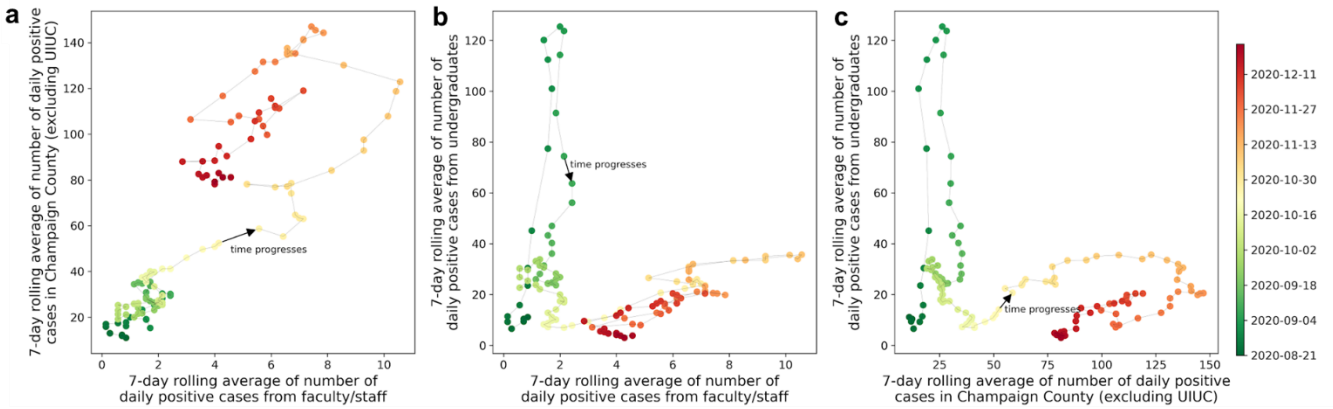

**Supplementary Fig. 10.** Measured correlations of the number of 7-day averaged daily new cases between residents in Champaign County, faculty/staff, and undergraduate students for the period between August 15 and December 23. All points in three scatter plots are colored according to their dates, as shown in the color bar on the right. **(a)** The number of 7-day averaged daily new cases of residents in Champaign county strongly correlated with that of faculty/staff especially for the period after October 18 (Pearson correlation coefficient 0.86, p-value  $7.99 \times 10^{-38}$  calculated using a two-tailed test). **(b)** At the beginning of the semester (around August 31) when there was a spike in daily new cases from undergraduate students, it had little influence on the faculty/staff. While at the late period of the semester (after October 18) when the case positivity in Illinois increased, they showed a correlation (Pearson correlation coefficient 0.88, p-value  $1.33 \times 10^{-21}$  calculated using a two-tailed test). **(c)** The initial spike in the number of daily new cases of undergraduate students doesn't correlate with that of residents in Champaign county. While at the late period of the semester (after October 18), as the number of positive cases in Champaign county increased and then decreased, the number of cases of undergraduate students also showed a similar trend.



**Supplementary Table 1. Comparison of Ct values from 25 clinical samples that were split into two aliquots upon receipt, one set was processed using our covidSHIELD assay and the other set was subjected to RNA extraction using MagMax Viral/Pathogen II (MVP II) Nucleic Acid Isolation Kit (ThermoFisher).**

| Sample #                          | Direct saliva | RNA extract | Direct saliva Ct Values |               |               |              | RNA extract Ct Values |               |               |          |
|-----------------------------------|---------------|-------------|-------------------------|---------------|---------------|--------------|-----------------------|---------------|---------------|----------|
|                                   | Call          | Call        | <i>ORF1ab</i>           | <i>N-gene</i> | <i>S-gene</i> | MS2          | <i>ORF1ab</i>         | <i>N-gene</i> | <i>S-gene</i> | MS2      |
| 1                                 | POSITIVE      | POSITIVE    | 34.87689                | 34.7379       | 35.15069      | 31.43486     | 32.53683              | 33.62223      | 33.32546      | 29.20287 |
| 2                                 | POSITIVE      | POSITIVE    | 35.77484                | 31.63383      | 34.52456      | 27.39116     | 31.82251              | 31.47362      | 33.69433      | 24.40539 |
| 3                                 | NEGATIVE      | NEGATIVE    | Undetermined            | Undetermined  | Undetermined  | 31.98769     | Undetermined          | Undetermined  | Undetermined  | 25.35025 |
| 4                                 | POSITIVE      | POSITIVE    | 21.35963                | 19.91812      | 21.34096      | Undetermined | 21.15125              | 20.97386      | 20.84411      | 25.25592 |
| 5                                 | POSITIVE      | POSITIVE    | 29.7138                 | 28.12146      | 29.12307      | 36.42744     | 28.12993              | 28.94287      | 26.80732      | 23.59188 |
| 6                                 | POSITIVE      | POSITIVE    | 31.75227                | 31.18219      | 32.32317      | 30.34586     | 29.79028              | 30.34225      | 29.37346      | 23.5     |
| 7                                 | POSITIVE      | POSITIVE    | 27.67761                | 26.04979      | 27.44747      | 33.67909     | 24.12692              | 24.64138      | 23.57869      | 22.80227 |
| 8                                 | POSITIVE      | POSITIVE    | 36.4927                 | 36.48437      | 36.93896      | 28.00187     | Undetermined          | 34.4855       | 36.89221      | 22.77695 |
| 9                                 | POSITIVE      | POSITIVE    | 18.32149                | 16.63957      | 17.65472      | Undetermined | 14.88425              | 14.77061      | 15.18406      | 26.68707 |
| 10                                | POSITIVE      | POSITIVE    | 30.50895                | 30.42821      | 31.71363      | 35.54698     | 28.93207              | 28.85836      | 29.24729      | 23.41111 |
| 11                                | POSITIVE      | POSITIVE    | 32.64179                | 34.5071       | 36.60606      | 38.88396     | 32.00633              | 32.99638      | 29.73417      | 22.02418 |
| 12                                | NEGATIVE      | NEGATIVE    | Undetermined            | Undetermined  | Undetermined  | 30.05719     | Undetermined          | Undetermined  | Undetermined  | 26.15957 |
| 13                                | NEGATIVE      | NEGATIVE    | Undetermined            | Undetermined  | Undetermined  | 30.69856     | Undetermined          | Undetermined  | Undetermined  | 25.32277 |
| 14                                | POSITIVE      | POSITIVE    | 24.31471                | 23.53031      | 24.30666      | 29.79528     | 23.33266              | 23.90056      | 23.92258      | 27.70757 |
| 15                                | POSITIVE      | POSITIVE    | 18.86967                | 17.92603      | 19.15773      | Undetermined | 19.11883              | 19.35747      | 19.49679      | 25.0189  |
| 16                                | POSITIVE      | POSITIVE    | Undetermined            | 36.27135      | 34.65929      | 30.30633     | Undetermined          | 34.78008      | 33.06602      | 24.60403 |
| 17                                | POSITIVE      | POSITIVE    | 26.1404                 | 23.63066      | 25.59911      | 31.9001      | 22.4836               | 22.44151      | 22.57868      | 23.68353 |
| 18                                | POSITIVE      | POSITIVE    | 24.88006                | 24.41358      | 25.35321      | Undetermined | 24.94342              | 25.0757       | 25.15791      | 25.10076 |
| 19                                | POSITIVE      | POSITIVE    | 34.05909                | 32.84715      | 33.15377      | 29.26073     | 30.61996              | 32.79143      | 30.9592       | 23.24416 |
| 20                                | NEGATIVE      | NEGATIVE    | 31.63252                | 31.42906      | 33.89475      | 32.67826     | 34.07472              | 33.28623      | 35.13592      | 26.34162 |
| 21                                | POSITIVE      | POSITIVE    | Undetermined            | Undetermined  | Undetermined  | 29.93763     | Undetermined          | Undetermined  | Undetermined  | 28.28117 |
| 22                                | POSITIVE      | POSITIVE    | 33.39564                | 31.59387      | 33.96499      | 28.2531      | 28.93732              | 29.36552      | 29.37632      | 25.81484 |
| 23                                | POSITIVE      | POSITIVE    | 17.52907                | 15.91184      | 17.7005       | Undetermined | 14.79202              | 14.88865      | 14.93889      | 31.47698 |
| 24                                | POSITIVE      | POSITIVE    | 32.60616                | 29.36388      | 32.66383      | 30.71958     | 30.41657              | 31.16113      | 30.37413      | 26.24533 |
| 25                                | POSITIVE      | POSITIVE    | 34.66038                | 32.72861      | 34.80508      | 30.83342     | 30.00526              | 31.25149      | 30.34891      | 24.93401 |
| Average Ct for viral target genes |               |             | 28.78                   |               |               |              | 27.14                 |               |               |          |



**Supplementary Table 2. Comparison of method of loading to the 384-well PCR plate (manual vs. multichannel robot) and the method of loading heat-inactivated saliva samples to the 96-deep-well plates pre-loaded with 2xTBE/1% Tween-20 buffer (manual vs. Span8 robot).**

| SARS-CoV-2 viral copies/mL | Sample # | saliva in 50mL tube to 96-deep-well plate | 96-deep-well to 384-well PCR plate | qPCR machine | Ct values     |               |               |      | Call     |
|----------------------------|----------|-------------------------------------------|------------------------------------|--------------|---------------|---------------|---------------|------|----------|
|                            |          |                                           |                                    |              | <i>ORF1ab</i> | <i>N-gene</i> | <i>S-gene</i> | MS2  |          |
| 500                        | 1        | manual                                    | multichannel robot                 | QS7Pro       | 33.9          | 34.9          | 34.3          | 30.2 | POSITIVE |
| 500                        | 2        | manual                                    | multichannel robot                 | QS7Pro       | 36.3          | 33.7          | 34.2          | 27.8 | POSITIVE |
| 500                        | 3        | manual                                    | multichannel robot                 | QS7Pro       | 35.9          | 33.7          | 33.7          | 27.9 | POSITIVE |
| 500                        | 4        | manual                                    | multichannel robot                 | QS7Pro       | 35.3          | 33.7          | 34.5          | 28.8 | POSITIVE |
| 500                        | 5        | manual                                    | multichannel robot                 | QS7Pro       | 35.7          | 33.1          | 33.6          | 27.9 | POSITIVE |
| 500                        | 6        | manual                                    | multichannel robot                 | QS7Pro       | 35.9          | 33.4          | Undetermined  | 26.8 | POSITIVE |
| 500                        | 7        | manual                                    | multichannel robot                 | QS7Pro       | Undetermined  | 33.3          | 33.9          | 27.8 | POSITIVE |
| 500                        | 8        | manual                                    | multichannel robot                 | QS7Pro       | 35.0          | 34.1          | 35.2          | 27.0 | POSITIVE |
| 500                        | 9        | manual                                    | multichannel robot                 | QS7Pro       | Undetermined  | 35.0          | 36.4          | 31.0 | POSITIVE |
| 500                        | 10       | manual                                    | multichannel robot                 | QS7Pro       | 33.6          | 33.4          | 33.4          | 28.9 | POSITIVE |
| 500                        | 11       | manual                                    | multichannel robot                 | QS7Pro       | 34.1          | 33.3          | 36.3          | 27.8 | POSITIVE |
| 500                        | 12       | manual                                    | multichannel robot                 | QS7Pro       | 35.0          | 34.7          | 37.1          | 27.8 | POSITIVE |
| 500                        | 13       | manual                                    | multichannel robot                 | QS7Pro       | 34.0          | 34.0          | 37.0          | 27.9 | POSITIVE |
| 500                        | 14       | manual                                    | multichannel robot                 | QS7Pro       | 33.9          | 33.1          | 34.6          | 27.6 | POSITIVE |
| 500                        | 15       | manual                                    | multichannel robot                 | QS7Pro       | 36.3          | 34.4          | Undetermined  | 27.3 | POSITIVE |
| 500                        | 16       | manual                                    | multichannel robot                 | QS7Pro       | 36.5          | 34.4          | 35.3          | 27.7 | POSITIVE |
| 500                        | 17       | manual                                    | multichannel robot                 | QS7Pro       | 33.9          | 34.1          | 36.9          | 28.1 | POSITIVE |
| 500                        | 18       | manual                                    | multichannel robot                 | QS7Pro       | 34.0          | 35.0          | 34.7          | 27.7 | POSITIVE |
| 500                        | 19       | manual                                    | multichannel robot                 | QS7Pro       | 36.0          | 34.8          | 37.1          | 28.1 | POSITIVE |
| 500                        | 20       | manual                                    | multichannel robot                 | QS7Pro       | 34.9          | 34.2          | 34.4          | 27.8 | POSITIVE |
| 500                        | 1        | manual                                    | manual                             | QS7Pro       | 34.9          | 34.3          | 36.2          | 28.7 | POSITIVE |
| 500                        | 2        | manual                                    | manual                             | QS7Pro       | 35.8          | 35.1          | 34.6          | 30.0 | POSITIVE |
| 500                        | 3        | manual                                    | manual                             | QS7Pro       | 33.6          | 34.1          | 34.1          | 27.5 | POSITIVE |
| 500                        | 4        | manual                                    | manual                             | QS7Pro       | Undetermined  | 33.6          | 33.6          | 29.0 | POSITIVE |
| 500                        | 5        | manual                                    | manual                             | QS7Pro       | 33.5          | 32.9          | 35.2          | 28.4 | POSITIVE |

|     |    |             |                    |        |              |      |              |      |          |
|-----|----|-------------|--------------------|--------|--------------|------|--------------|------|----------|
| 500 | 6  | manual      | manual             | QS7Pro | 34.6         | 33.6 | 35.2         | 27.8 | POSITIVE |
| 500 | 7  | manual      | manual             | QS7Pro | 37.0         | 34.3 | 34.1         | 29.0 | POSITIVE |
| 500 | 8  | manual      | manual             | QS7Pro | 34.0         | 33.3 | 36.1         | 27.5 | POSITIVE |
| 500 | 9  | manual      | manual             | QS7Pro | 34.3         | 32.6 | 34.5         | 27.6 | POSITIVE |
| 500 | 10 | manual      | manual             | QS7Pro | 36.6         | 36.6 | 35.1         | 27.5 | POSITIVE |
| 500 | 11 | manual      | manual             | QS7Pro | 34.7         | 33.4 | 34.7         | 28.1 | POSITIVE |
| 500 | 12 | manual      | manual             | QS7Pro | 34.3         | 33.7 | 32.8         | 28.1 | POSITIVE |
| 500 | 13 | manual      | manual             | QS7Pro | 35.0         | 33.9 | 35.3         | 28.8 | POSITIVE |
| 500 | 14 | manual      | manual             | QS7Pro | 33.5         | 33.1 | 33.8         | 28.5 | POSITIVE |
| 500 | 15 | manual      | manual             | QS7Pro | 34.5         | 34.3 | 35.5         | 28.3 | POSITIVE |
| 500 | 16 | manual      | manual             | QS7Pro | 33.7         | 33.8 | 34.4         | 27.6 | POSITIVE |
| 500 | 17 | manual      | manual             | QS7Pro | 35.2         | 33.7 | 34.1         | 27.4 | POSITIVE |
| 500 | 18 | manual      | manual             | QS7Pro | 35.6         | 33.7 | 38.2         | 28.4 | POSITIVE |
| 500 | 19 | manual      | manual             | QS7Pro | 33.8         | 33.7 | 34.1         | 27.3 | POSITIVE |
| 500 | 20 | manual      | manual             | QS7Pro | 33.0         | 33.7 | 33.8         | 27.4 | POSITIVE |
| 500 | 1  | Span8 robot | multichannel robot | QS7Pro | 35.2         | 34.4 | Undetermined | 26.6 | POSITIVE |
| 500 | 2  | Span8 robot | multichannel robot | QS7Pro | 34.9         | 34.9 | 39.7         | 26.2 | POSITIVE |
| 500 | 3  | Span8 robot | multichannel robot | QS7Pro | 35.3         | 34.6 | 35.8         | 26.0 | POSITIVE |
| 500 | 4  | Span8 robot | multichannel robot | QS7Pro | 36.6         | 34.9 | 35.8         | 25.5 | POSITIVE |
| 500 | 5  | Span8 robot | multichannel robot | QS7Pro | 37.7         | 34.1 | 35.3         | 25.8 | POSITIVE |
| 500 | 6  | Span8 robot | multichannel robot | QS7Pro | 34.7         | 34.3 | 38.9         | 25.8 | POSITIVE |
| 500 | 7  | Span8 robot | multichannel robot | QS7Pro | 39.5         | 35.6 | 36.3         | 25.8 | POSITIVE |
| 500 | 8  | Span8 robot | multichannel robot | QS7Pro | 34.6         | 36.9 | 34.4         | 25.8 | POSITIVE |
| 500 | 9  | Span8 robot | multichannel robot | QS7Pro | 38.0         | 34.2 | 35.9         | 25.9 | POSITIVE |
| 500 | 10 | Span8 robot | multichannel robot | QS7Pro | 34.3         | 34.4 | 39.1         | 26.1 | POSITIVE |
| 500 | 11 | Span8 robot | multichannel robot | QS7Pro | 33.7         | 33.8 | 37.0         | 26.3 | POSITIVE |
| 500 | 12 | Span8 robot | multichannel robot | QS7Pro | Undetermined | 35.3 | 35.3         | 26.0 | POSITIVE |
| 500 | 13 | Span8 robot | multichannel robot | QS7Pro | 34.5         | 34.4 | 35.4         | 26.2 | POSITIVE |
| 500 | 14 | Span8 robot | multichannel robot | QS7Pro | 36.6         | 34.1 | 34.5         | 26.0 | POSITIVE |
| 500 | 15 | Span8 robot | multichannel robot | QS7Pro | 37.5         | 35.3 | 34.7         | 26.1 | POSITIVE |
| 500 | 16 | Span8 robot | multichannel robot | QS7Pro | 35.0         | 33.4 | 39.2         | 26.1 | POSITIVE |
| 500 | 17 | Span8 robot | multichannel robot | QS7Pro | 35.1         | 35.1 | 33.8         | 26.0 | POSITIVE |
| 500 | 18 | Span8 robot | multichannel robot | QS7Pro | 34.1         | 33.6 | 33.7         | 26.0 | POSITIVE |
| 500 | 19 | Span8 robot | multichannel robot | QS7Pro | 34.6         | 34.7 | 39.3         | 26.0 | POSITIVE |

|     |    |                         |                    |        |               |               |               |      |          |
|-----|----|-------------------------|--------------------|--------|---------------|---------------|---------------|------|----------|
| 500 | 20 | Span8 robot             | multichannel robot | QS7Pro | 33.2          | 33.8          | 35.4          | 26.1 | POSITIVE |
|     |    |                         |                    |        |               |               |               |      |          |
|     |    |                         |                    |        | <i>ORF1ab</i> | <i>N-gene</i> | <i>S-gene</i> |      |          |
|     |    | Average manual → robot  |                    |        | 35.0          | 34.0          | 35.1          |      |          |
|     |    | Average manual → manual |                    |        | 34.6          | 33.9          | 34.8          |      |          |
|     |    | Average robot → robot   |                    |        | 35.5          | 34.6          | 36.3          |      |          |

We compared the method of loading samples to the 96-deep-well plate (manual vs. Span8 robot) and the method of loading to the 384-well PCR plate (manual vs. multichannel robot) as variables in a linear model. No significant difference was observed, with a calculated respective  $p$ -value of  $p=0.127$  and  $p=0.24$ , calculated using 2-tailed, unpaired t-test. We also completed an ANOVA of the different combinations used, with Tukey's Honestly Significant Difference to look at contrasts, and found that there were no significant differences overall ( $p=0.277$ ) or in any pairs compared: (1) manual load to 96-deep well plate and manual load to 384-well PCR plate vs. manual load to 96-deep well plate and multichannel robot to 384-well PCR plate  $p=0.465$ ; (2) manual load to 96-deep well plate and manual load to 384-well PCR plate vs. Span8 robot to 96-deep well plate and multichannel robot to 384-well PCR plate  $p=0.931$ ; and (3) Span8 robot to 96-deep well plate and multichannel robot to 384-well PCR plate vs. manual load to 96-deep well plate and multichannel robot to 384-well PCR plate  $p=0.277$ .

**Supplementary Table 3. Endogenous & Exogenous Interference testing results for covidSHIELD assay**

| Potential Interfering Substances           | Concentration                   | Negative Samples | Positive Samples             |
|--------------------------------------------|---------------------------------|------------------|------------------------------|
|                                            |                                 | Detected         | Detected                     |
| Saliva Samples                             |                                 |                  |                              |
| Nasal congestion spray                     | 15% v/v                         | 3/3 Negative     | 3/3 Positive                 |
| NeilMed Nasogel                            | 1.25%                           | 3/3 Negative     | 3/3 Positive                 |
| Cepacol Lozenges (benzocaine/menthol)      | 3 mg/mL                         | 3/3 Negative     | 3/3 Positive                 |
| Chloroseptic Sore Throat spray             | 5% v/v                          | 3/3 Negative     | 3/3 Positive                 |
| Crest/Listerine Mouthwash                  | 5% v/v                          | 3/3 Negative     | 3/3 Positive                 |
| Act dry mouth lozenges                     | 3 mg/mL                         | 3/3 Negative     | 3/3 Positive                 |
| Toothpaste (Colgate)                       | 0.5% v/v                        | 3/3 Negative     | 1/3 Negative<br>2/3 Positive |
| Mucin: bovine submaxillary gland, type I-S | 2.5 mg/ml                       | 3/3 Negative     | 3/3 Positive                 |
| Human Genomic DNA                          | 10 ng/μl                        | 3/3 Negative     | 3/3 Positive                 |
| White blood cells/Leukocytes               | 1 to 5x10 <sup>6</sup> cells/mL | 3/3 Negative     | 3/3 Positive                 |
| Nicotine                                   | 0.03 mg/mL                      | 3/3 Negative     | 3/3 Positive                 |

**Supplementary Table 4. Qualitative outcome of parallel testing of paired mid-turbinate swabs and saliva with the Abbott RealTime SARS-CoV-2 assay and covidSHIELD.**

| ID # | Comparator type | Comparator Result (POSITIVE or NEGATIVE) | Comparator CN Value | covidSHIELD Result (POSITIVE or NEGATIVE) | covidSHIELD S-gene CT Value | covidSHIELD N-gene CT Value | covidSHIELD ORF1ab gene CT Value | Comments/ Notes                                                                                                      | Retest covidSHIELD S-gene CT Value | Retest covidSHIELD N-gene CT Value | Retest covidSHIELD ORF1ab gene CT Value |
|------|-----------------|------------------------------------------|---------------------|-------------------------------------------|-----------------------------|-----------------------------|----------------------------------|----------------------------------------------------------------------------------------------------------------------|------------------------------------|------------------------------------|-----------------------------------------|
| 1    | NP Swab         | POSITIVE                                 | 13.52               | POSITIVE                                  | 22.81                       | 21.97                       | 22.08                            |                                                                                                                      |                                    |                                    |                                         |
| 2    | NP Swab         | NEGATIVE                                 | -1                  | NEGATIVE                                  | Undetermined                | Undetermined                | Undetermined                     |                                                                                                                      |                                    |                                    |                                         |
| 3    | NP Swab         | POSITIVE                                 | 6.03                | POSITIVE                                  | 24.77                       | 23.6                        | 24.3                             |                                                                                                                      |                                    |                                    |                                         |
| 4    | NP Swab         | NEGATIVE                                 | -1                  | NEGATIVE                                  | Undetermined                | Undetermined                | Undetermined                     |                                                                                                                      |                                    |                                    |                                         |
| 5    | NP Swab         | NEGATIVE                                 | -1                  | NEGATIVE                                  | Undetermined                | Undetermined                | Undetermined                     |                                                                                                                      |                                    |                                    |                                         |
| 6    | NP Swab         | POSITIVE                                 | 19.82               | POSITIVE                                  | Undetermined                | 35.57                       | Undetermined                     | Saliva sample was inconclusive with only 1 viral gene Ct<39. Per protocol, sample was rerun and result was positive. | 36.68                              | 36.13                              | 35.90                                   |
| 7    | NP Swab         | POSITIVE                                 | 6.54                | POSITIVE                                  | 35.62                       | 33.45                       | 38.4                             |                                                                                                                      |                                    |                                    |                                         |
| 8    | NP Swab         | NEGATIVE                                 | -1                  | NEGATIVE                                  | Undetermined                | Undetermined                | Undetermined                     |                                                                                                                      |                                    |                                    |                                         |
| 9    | NP Swab         | NEGATIVE                                 | -1                  | NEGATIVE                                  | Undetermined                | Undetermined                | Undetermined                     |                                                                                                                      |                                    |                                    |                                         |
| 10   | NP Swab         | NEGATIVE                                 | -1                  | POSITIVE                                  | 36.29                       | 35.96                       | 35.38                            |                                                                                                                      |                                    |                                    |                                         |
| 11   | NP Swab         | NEGATIVE                                 | -1                  | NEGATIVE                                  | Undetermined                | Undetermined                | Undetermined                     |                                                                                                                      |                                    |                                    |                                         |
| 12   | NP Swab         | NEGATIVE                                 | -1                  | NEGATIVE                                  | Undetermined                | Undetermined                | Undetermined                     |                                                                                                                      |                                    |                                    |                                         |
| 13   | NP Swab         | NEGATIVE                                 | -1                  | NEGATIVE                                  | Undetermined                | Undetermined                | Undetermined                     |                                                                                                                      |                                    |                                    |                                         |
| 14   | NP Swab         | NEGATIVE                                 | -1                  | NEGATIVE                                  | Undetermined                | Undetermined                | Undetermined                     |                                                                                                                      |                                    |                                    |                                         |
| 15   | NP Swab         | NEGATIVE                                 | -1                  | NEGATIVE                                  | Undetermined                | Undetermined                | Undetermined                     |                                                                                                                      |                                    |                                    |                                         |
| 16   | NP Swab         | POSITIVE                                 | 10.95               | POSITIVE                                  | 29.29                       | 27.01                       | 28.42                            |                                                                                                                      |                                    |                                    |                                         |
| 17   | NP Swab         | POSITIVE                                 | 7.56                | POSITIVE                                  | 26.74                       | 25.32                       | 26.89                            |                                                                                                                      |                                    |                                    |                                         |
| 18   | NP Swab         | NEGATIVE                                 | -1                  | NEGATIVE                                  | Undetermined                | Undetermined                | Undetermined                     |                                                                                                                      |                                    |                                    |                                         |
| 19   | NP Swab         | POSITIVE                                 | 14.58               | POSITIVE                                  | 33.95                       | 30.98                       | 32.57                            |                                                                                                                      |                                    |                                    |                                         |
| 20   | NP Swab         | NEGATIVE                                 | -1                  | NEGATIVE                                  | Undetermined                | Undetermined                | Undetermined                     |                                                                                                                      |                                    |                                    |                                         |
| 21   | NP Swab         | NEGATIVE                                 | -1                  | NEGATIVE                                  | Undetermined                | Undetermined                | Undetermined                     |                                                                                                                      |                                    |                                    |                                         |
| 22   | NP Swab         | NEGATIVE                                 | -1                  | NEGATIVE                                  | Undetermined                | Undetermined                | Undetermined                     |                                                                                                                      |                                    |                                    |                                         |
| 23   | NP Swab         | NEGATIVE                                 | -1                  | NEGATIVE                                  | Undetermined                | Undetermined                | Undetermined                     |                                                                                                                      |                                    |                                    |                                         |
| 24   | NP Swab         | NEGATIVE                                 | -1                  | NEGATIVE                                  | Undetermined                | Undetermined                | Undetermined                     |                                                                                                                      |                                    |                                    |                                         |
| 25   | NP Swab         | POSITIVE                                 | 14.58               | POSITIVE                                  | 36.43                       | 32.46                       | 34.31                            |                                                                                                                      |                                    |                                    |                                         |
| 26   | NP Swab         | POSITIVE                                 | 22.01               | POSITIVE                                  | 28.84                       | 26.7                        | 28.39                            |                                                                                                                      |                                    |                                    |                                         |
| 27   | NP Swab         | NEGATIVE                                 | -1                  | NEGATIVE                                  | Undetermined                | Undetermined                | Undetermined                     |                                                                                                                      |                                    |                                    |                                         |
| 28   | NP Swab         | NEGATIVE                                 | -1                  | NEGATIVE                                  | Undetermined                | Undetermined                | Undetermined                     |                                                                                                                      |                                    |                                    |                                         |
| 29   | NP Swab         | POSITIVE                                 | 24.61               | NEGATIVE                                  | Undetermined                | Undetermined                | Undetermined                     |                                                                                                                      |                                    |                                    |                                         |
| 30   | NP Swab         | NEGATIVE                                 | -1                  | NEGATIVE                                  | Undetermined                | Undetermined                | Undetermined                     |                                                                                                                      |                                    |                                    |                                         |
| 31   | NP Swab         | NEGATIVE                                 | -1                  | NEGATIVE                                  | Undetermined                | Undetermined                | Undetermined                     |                                                                                                                      |                                    |                                    |                                         |
| 32   | NP Swab         | POSITIVE                                 | 11.22               | POSITIVE                                  | 23.77                       | 21.96                       | 23.15                            |                                                                                                                      |                                    |                                    |                                         |

|    |  |         |          |       |          |              |              |              |  |  |  |  |
|----|--|---------|----------|-------|----------|--------------|--------------|--------------|--|--|--|--|
| 33 |  | NP Swab | NEGATIVE | -1    | NEGATIVE | Undetermined | Undetermined | Undetermined |  |  |  |  |
| 34 |  | NP Swab | POSITIVE | 14.97 | POSITIVE | 24.6         | 23.98        | 24.45        |  |  |  |  |
| 35 |  | NP Swab | POSITIVE | 7.81  | POSITIVE | 29.92        | 29.3         | 29.71        |  |  |  |  |
| 36 |  | NP Swab | POSITIVE | 11.26 | POSITIVE | 27.65        | 26.86        | 27.73        |  |  |  |  |
| 37 |  | NP Swab | POSITIVE | 16.14 | POSITIVE | 29.5         | 28.83        | 30.15        |  |  |  |  |
| 38 |  | NP Swab | POSITIVE | 17.72 | POSITIVE | 25.93        | 24.27        | 26.32        |  |  |  |  |
| 39 |  | NP Swab | POSITIVE | 6.09  | POSITIVE | 26.64        | 25.3         | 26.26        |  |  |  |  |
| 40 |  | NP Swab | POSITIVE | 16.24 | POSITIVE | 28.07        | 26.39        | 27.67        |  |  |  |  |
| 41 |  | NP Swab | POSITIVE | 8.84  | POSITIVE | 28.79        | 26.17        | 27.59        |  |  |  |  |
| 42 |  | NP Swab | POSITIVE | 7.95  | POSITIVE | 35           | 32.8         | 34.9         |  |  |  |  |
| 43 |  | NP Swab | POSITIVE | 4.6   | POSITIVE | 27.21        | 25.77        | 27.02        |  |  |  |  |
| 44 |  | NP Swab | NEGATIVE | -1    | NEGATIVE | Undetermined | Undetermined | Undetermined |  |  |  |  |
| 45 |  | NP Swab | NEGATIVE | -1    | NEGATIVE | Undetermined | Undetermined | Undetermined |  |  |  |  |
| 46 |  | NP Swab | NEGATIVE | -1    | NEGATIVE | Undetermined | Undetermined | Undetermined |  |  |  |  |
| 47 |  | NP Swab | NEGATIVE | -1    | NEGATIVE | Undetermined | Undetermined | Undetermined |  |  |  |  |
| 48 |  | NP Swab | NEGATIVE | -1    | NEGATIVE | Undetermined | Undetermined | Undetermined |  |  |  |  |
| 49 |  | NP Swab | NEGATIVE | -1    | NEGATIVE | Undetermined | Undetermined | Undetermined |  |  |  |  |
| 50 |  | NP Swab | POSITIVE | 10.24 | POSITIVE | 26.25        | 25.27        | 26.68        |  |  |  |  |
| 51 |  | NP Swab | POSITIVE | 8.58  | POSITIVE | 28.03        | 26.44        | 27.72        |  |  |  |  |
| 52 |  | NP Swab | NEGATIVE | -1    | NEGATIVE | Undetermined | Undetermined | Undetermined |  |  |  |  |
| 53 |  | NP Swab | NEGATIVE | -1    | NEGATIVE | Undetermined | Undetermined | Undetermined |  |  |  |  |
| 54 |  | NP Swab | NEGATIVE | -1    | NEGATIVE | Undetermined | Undetermined | Undetermined |  |  |  |  |
| 55 |  | NP Swab | NEGATIVE | -1    | NEGATIVE | Undetermined | Undetermined | Undetermined |  |  |  |  |
| 56 |  | NP Swab | NEGATIVE | -1    | NEGATIVE | Undetermined | Undetermined | Undetermined |  |  |  |  |
| 57 |  | NP Swab | NEGATIVE | -1    | NEGATIVE | Undetermined | Undetermined | Undetermined |  |  |  |  |
| 58 |  | NP Swab | NEGATIVE | -1    | NEGATIVE | Undetermined | Undetermined | Undetermined |  |  |  |  |
| 59 |  | NP Swab | NEGATIVE | -1    | NEGATIVE | Undetermined | Undetermined | Undetermined |  |  |  |  |
| 60 |  | NP Swab | NEGATIVE | -1    | NEGATIVE | Undetermined | Undetermined | Undetermined |  |  |  |  |
| 61 |  | NP Swab | NEGATIVE | -1    | NEGATIVE | Undetermined | Undetermined | Undetermined |  |  |  |  |
| 62 |  | NP Swab | NEGATIVE | -1    | NEGATIVE | Undetermined | Undetermined | Undetermined |  |  |  |  |
| 63 |  | NP Swab | NEGATIVE | -1    | NEGATIVE | Undetermined | Undetermined | Undetermined |  |  |  |  |
| 64 |  | NP Swab | NEGATIVE | -1    | NEGATIVE | Undetermined | Undetermined | Undetermined |  |  |  |  |
| 65 |  | NP Swab | POSITIVE | 7.18  | POSITIVE | 25.01        | 24.39        | 24.97        |  |  |  |  |
| 66 |  | NP Swab | POSITIVE | 7.36  | POSITIVE | 22.35        | 21.79        | 22.28        |  |  |  |  |
| 67 |  | MT Swab | POSITIVE | 8.01  | POSITIVE | 33.06        | 30.76        | 32.11        |  |  |  |  |
| 68 |  | MT Swab | POSITIVE | 17.81 | POSITIVE | 28.47        | 26.97        | 27.46        |  |  |  |  |
| 69 |  | MT Swab | POSITIVE | 5.1   | POSITIVE | 25.06        | 24.05        | 24.70        |  |  |  |  |
| 70 |  | MT Swab | POSITIVE | 3.29  | POSITIVE | 29.63        | 28.1         | 28.85        |  |  |  |  |
| 71 |  | MT Swab | POSITIVE | 11.62 | POSITIVE | 36.72        | 37.36        | Undetermined |  |  |  |  |
| 72 |  | MT Swab | NEGATIVE | -1    | NEGATIVE | Undetermined | Undetermined | Undetermined |  |  |  |  |
| 73 |  | MT Swab | NEGATIVE | -1    | NEGATIVE | Undetermined | Undetermined | Undetermined |  |  |  |  |
| 74 |  | MT Swab | NEGATIVE | -1    | NEGATIVE | Undetermined | Undetermined | Undetermined |  |  |  |  |
| 75 |  | MT Swab | NEGATIVE | -1    | NEGATIVE | Undetermined | Undetermined | Undetermined |  |  |  |  |

|     |  |         |          |     |          |              |              |              |                                                                                                                                                                                                                                                                                                   |  |  |  |
|-----|--|---------|----------|-----|----------|--------------|--------------|--------------|---------------------------------------------------------------------------------------------------------------------------------------------------------------------------------------------------------------------------------------------------------------------------------------------------|--|--|--|
| 76  |  | MT Swab | NEGATIVE | -1  | NEGATIVE | Undetermined | Undetermined | Undetermined |                                                                                                                                                                                                                                                                                                   |  |  |  |
| 77  |  | MT Swab | NEGATIVE | -1  | NEGATIVE | Undetermined | Undetermined | Undetermined |                                                                                                                                                                                                                                                                                                   |  |  |  |
| 78  |  | MT Swab | NEGATIVE | -1  | NEGATIVE | Undetermined | Undetermined | Undetermined |                                                                                                                                                                                                                                                                                                   |  |  |  |
| 79  |  | MT Swab | NEGATIVE | -1  | NEGATIVE | Undetermined | Undetermined | Undetermined |                                                                                                                                                                                                                                                                                                   |  |  |  |
| 80  |  | MT Swab | NEGATIVE | -1  | NEGATIVE | Undetermined | Undetermined | Undetermined |                                                                                                                                                                                                                                                                                                   |  |  |  |
| 81  |  | MT Swab | NEGATIVE | -1  | NEGATIVE | Undetermined | Undetermined | Undetermined |                                                                                                                                                                                                                                                                                                   |  |  |  |
| 82  |  | MT Swab | NEGATIVE | -1  | NEGATIVE | Undetermined | Undetermined | Undetermined |                                                                                                                                                                                                                                                                                                   |  |  |  |
| 83  |  | MT Swab | NEGATIVE | -1  | NEGATIVE | Undetermined | Undetermined | Undetermined |                                                                                                                                                                                                                                                                                                   |  |  |  |
| 84  |  | MT Swab | NEGATIVE | -1  | NEGATIVE | Undetermined | Undetermined | Undetermined |                                                                                                                                                                                                                                                                                                   |  |  |  |
| 85  |  | MT Swab | NEGATIVE | -1  | NEGATIVE | Undetermined | Undetermined | Undetermined |                                                                                                                                                                                                                                                                                                   |  |  |  |
| 86  |  | MT Swab | NEGATIVE | -1  | NEGATIVE | Undetermined | Undetermined | Undetermined |                                                                                                                                                                                                                                                                                                   |  |  |  |
| 87  |  | MT Swab | NEGATIVE | -1  | NEGATIVE | Undetermined | Undetermined | Undetermined |                                                                                                                                                                                                                                                                                                   |  |  |  |
| 88  |  | MT Swab | NEGATIVE | -1  | NEGATIVE | Undetermined | Undetermined | Undetermined |                                                                                                                                                                                                                                                                                                   |  |  |  |
| 89  |  | MT Swab | NEGATIVE | -1  | NEGATIVE | Undetermined | Undetermined | Undetermined |                                                                                                                                                                                                                                                                                                   |  |  |  |
| 90  |  | MT Swab | NEGATIVE | -1  | NEGATIVE | Undetermined | Undetermined | Undetermined |                                                                                                                                                                                                                                                                                                   |  |  |  |
| 91  |  | MT Swab | NEGATIVE | -1  | NEGATIVE | Undetermined | Undetermined | Undetermined |                                                                                                                                                                                                                                                                                                   |  |  |  |
| 92  |  | MT Swab | NEGATIVE | -1  | NEGATIVE | Undetermined | Undetermined | Undetermined |                                                                                                                                                                                                                                                                                                   |  |  |  |
| 93  |  | MT Swab | NEGATIVE | -1  | NEGATIVE | Undetermined | Undetermined | Undetermined |                                                                                                                                                                                                                                                                                                   |  |  |  |
| 94  |  | MT Swab | NEGATIVE | -1  | NEGATIVE | Undetermined | Undetermined | Undetermined |                                                                                                                                                                                                                                                                                                   |  |  |  |
| 95  |  | MT Swab | NEGATIVE | -1  | NEGATIVE | Undetermined | Undetermined | Undetermined |                                                                                                                                                                                                                                                                                                   |  |  |  |
| 96  |  | MT Swab | NEGATIVE | -1  | NEGATIVE | Undetermined | Undetermined | Undetermined |                                                                                                                                                                                                                                                                                                   |  |  |  |
| 97  |  | MT Swab | NEGATIVE | -1  | NEGATIVE | Undetermined | Undetermined | Undetermined |                                                                                                                                                                                                                                                                                                   |  |  |  |
| 98  |  | MT Swab | NEGATIVE | -1  | NEGATIVE | Undetermined | Undetermined | Undetermined |                                                                                                                                                                                                                                                                                                   |  |  |  |
| 99  |  | MT Swab | NEGATIVE | -1  | NEGATIVE | Undetermined | Undetermined | Undetermined |                                                                                                                                                                                                                                                                                                   |  |  |  |
| 100 |  | MT Swab | NEGATIVE | -1  | NEGATIVE | Undetermined | Undetermined | Undetermined |                                                                                                                                                                                                                                                                                                   |  |  |  |
| 101 |  | MT Swab | POSITIVE | 3.5 | POSITIVE | 19.92        | 19.14        | 19.82        | Nasal test was at first inconclusive , then when rerun, was inconclusive . Path lab created a 1:3 dilution, which then resulted in positive result, presented here. The path lab director wrote "The assay was giving errors because that viral load is above the upper limit of quantification". |  |  |  |
| 102 |  | MT Swab | NEGATIVE | -1  | NEGATIVE | Undetermined | Undetermined | Undetermined |                                                                                                                                                                                                                                                                                                   |  |  |  |
| 103 |  | MT Swab | NEGATIVE | -1  | NEGATIVE | Undetermined | Undetermined | Undetermined |                                                                                                                                                                                                                                                                                                   |  |  |  |
| 104 |  | MT Swab | NEGATIVE | -1  | NEGATIVE | Undetermined | Undetermined | Undetermined |                                                                                                                                                                                                                                                                                                   |  |  |  |

|     |  |         |          |    |          |              |              |              |  |  |  |  |
|-----|--|---------|----------|----|----------|--------------|--------------|--------------|--|--|--|--|
| 105 |  | MT Swab | NEGATIVE | -1 | NEGATIVE | Undetermined | Undetermined | Undetermined |  |  |  |  |
| 106 |  | MT Swab | NEGATIVE | -1 | NEGATIVE | Undetermined | Undetermined | Undetermined |  |  |  |  |
| 107 |  | MT Swab | NEGATIVE | -1 | NEGATIVE | Undetermined | Undetermined | Undetermined |  |  |  |  |
| 108 |  | MT Swab | NEGATIVE | -1 | NEGATIVE | Undetermined | Undetermined | Undetermined |  |  |  |  |
| 109 |  | MT Swab | NEGATIVE | -1 | NEGATIVE | Undetermined | Undetermined | Undetermined |  |  |  |  |
| 110 |  | MT Swab | NEGATIVE | -1 | NEGATIVE | Undetermined | Undetermined | Undetermined |  |  |  |  |
| 111 |  | MT Swab | NEGATIVE | -1 | NEGATIVE | Undetermined | Undetermined | Undetermined |  |  |  |  |
| 112 |  | MT Swab | NEGATIVE | -1 | NEGATIVE | Undetermined | Undetermined | Undetermined |  |  |  |  |
| 113 |  | MT Swab | NEGATIVE | -1 | NEGATIVE | Undetermined | Undetermined | Undetermined |  |  |  |  |
| 114 |  | MT Swab | NEGATIVE | -1 | NEGATIVE | Undetermined | Undetermined | Undetermined |  |  |  |  |
| 115 |  | MT Swab | NEGATIVE | -1 | NEGATIVE | Undetermined | Undetermined | Undetermined |  |  |  |  |
| 116 |  | MT Swab | NEGATIVE | -1 | NEGATIVE | Undetermined | Undetermined | Undetermined |  |  |  |  |
| 117 |  | MT Swab | NEGATIVE | -1 | NEGATIVE | Undetermined | Undetermined | Undetermined |  |  |  |  |
| 118 |  | MT Swab | NEGATIVE | -1 | NEGATIVE | Undetermined | Undetermined | Undetermined |  |  |  |  |
| 119 |  | MT Swab | NEGATIVE | -1 | NEGATIVE | Undetermined | Undetermined | Undetermined |  |  |  |  |
| 120 |  | MT Swab | NEGATIVE | -1 | NEGATIVE | Undetermined | Undetermined | Undetermined |  |  |  |  |



**Supplementary Table 5. Method comparison study completed to support the correlation between saliva samples processed with covidSHIELD and nasal samples processed with Abbott RealTime SARS-CoV-2 assay performed on the Abbott m2000 System.**

|                                                                                      |                                                                                                                                                                                                                                                                                                                 |
|--------------------------------------------------------------------------------------|-----------------------------------------------------------------------------------------------------------------------------------------------------------------------------------------------------------------------------------------------------------------------------------------------------------------|
| Name of Candidate device                                                             | covidSHIELD                                                                                                                                                                                                                                                                                                     |
| Study Title                                                                          | Method comparison study for covidSHIELD to an RT-qPCR nasopharyngeal or mid-turbinate reference method for detection of SARS-CoV-2.                                                                                                                                                                             |
| Study Type (CLIA – high/moderate complexity, CLIA waived/POC, OTC, usability, other) | The candidate device is a high complexity assay only housed in high complexity CLIA-certified laboratories<br><br>Saliva samples were self-collected with observation                                                                                                                                           |
| Number of Study Sites                                                                | Samples were collected at 4 different sites (one in Urbana, IL; One in Madison, WI; two in Chicago, IL); candidate testing was done at one testing site.                                                                                                                                                        |
| Operators                                                                            | Operators processed samples for comparator and candidate in high complexity labs with appropriate trained personnel.                                                                                                                                                                                            |
| Target Population                                                                    | Study population included:<br><br>Participants over the age of 18<br>Participants suspected of COVID-19 (either with symptoms or with known exposures to someone positive for COVID-19).                                                                                                                        |
| Number of Participants                                                               | We enrolled a total of 120 participants. We had 31 positives and 89 negatives as determined by the comparator (either an MT or NP swab, as available at each site).                                                                                                                                             |
| Study Objective                                                                      | To determine the positive percent agreement (PPA) and negative percent agreement (NPA) between the candidate device on saliva samples and an EUA-authorized RT-qPCR assay (specifically, the Abbott RealTime SARS-CoV-2 assay with an LoD of 2,700 NDU/ml according to the list of FDA Reference Panel assays). |
| Study Comparator                                                                     | Abbott RealTime SARS-CoV-2 assay performed on the Abbott m2000 System                                                                                                                                                                                                                                           |

|                                                                |                                                                                                                                                                                                                                                                                                                                                                                                                                                                                                                                                                                                                                                                                                                                                                                                                                                                                                                                                                    |
|----------------------------------------------------------------|--------------------------------------------------------------------------------------------------------------------------------------------------------------------------------------------------------------------------------------------------------------------------------------------------------------------------------------------------------------------------------------------------------------------------------------------------------------------------------------------------------------------------------------------------------------------------------------------------------------------------------------------------------------------------------------------------------------------------------------------------------------------------------------------------------------------------------------------------------------------------------------------------------------------------------------------------------------------|
| <p>Comparator Device Sample matrix and collection method</p>   | <p>The comparator sample was either a mid-turbinate or nasopharyngeal swab collected by a healthcare professional. Each swab was placed into a vial of collection media and transported to the test instrument (per the comparator manufacturer’s instructions).</p>                                                                                                                                                                                                                                                                                                                                                                                                                                                                                                                                                                                                                                                                                               |
| <p>Study General Design and Duration</p>                       | <p>Participants were approached:</p> <ul style="list-style-type: none"> <li>• Prospectively while visiting a saliva collection site (Urbana) OR</li> <li>• Prospectively while visiting one of two different urgent care centers (Chicago) OR</li> <li>• Following a recent anterior nares swab positive test for SARS-CoV-2. Approximately 24 hours following the anterior nares swab collection, those individuals who tested positive were asked to consent to a research study. (Madison)</li> </ul> <p>After consent, participants answered survey questions about symptoms and provided a self-collected saliva specimen and either a mid-turbinate or nasopharyngeal swab specimen (as available at each site), collected by a healthcare professional.</p>                                                                                                                                                                                                 |
| <p>Participant &amp; Sample Inclusion / Exclusion Criteria</p> | <p>Inclusion Criteria for Participants:<br/>Participants meeting the following criteria were included in this study:</p> <ol style="list-style-type: none"> <li>1. Participant is 18 years of age or older</li> <li>2. Participant must be willing and able to provide a saliva sample and willing and able to have a healthcare professional successfully collect a mid-turbinate or nasopharyngeal sample</li> <li>3. Participant must be willing and able to answer questions about their symptoms as part of the data collected for this study</li> <li>4. Participant self-reported being symptomatic</li> </ol> <p>Exclusion Criteria for Participants:<br/>Patients with the following criteria were excluded:</p> <ol style="list-style-type: none"> <li>1. Participants under 18 years of age</li> <li>2. Participants who have previously tested positive for SARS-CoV-2, indicating that they have previously been infected with SARS-CoV-2.</li> </ol> |

|                             |                                                                                                                                                                                                                                                                                                                                                                                                                                                                                                                                                                                                                                                                                                                                                                                                                                                                                                                                                                                                                                         |
|-----------------------------|-----------------------------------------------------------------------------------------------------------------------------------------------------------------------------------------------------------------------------------------------------------------------------------------------------------------------------------------------------------------------------------------------------------------------------------------------------------------------------------------------------------------------------------------------------------------------------------------------------------------------------------------------------------------------------------------------------------------------------------------------------------------------------------------------------------------------------------------------------------------------------------------------------------------------------------------------------------------------------------------------------------------------------------------|
|                             | <p>3. Participants who have had anything “by mouth” (eaten, drank, brushed their teeth, smoked or chewed gum etc.) in the last 60 minutes.</p> <p>Exclusion Criteria for Samples:</p> <ol style="list-style-type: none"> <li>1. If sample tube label was illegible, the sample would have been excluded from the study</li> <li>2. If sample tube had evidence of leaking or volume loss, the sample would have been excluded from the study</li> <li>3. If sample had visual debris present or any obvious contamination due to blood, food or beverage etc, the sample would have been excluded from the study.</li> </ol>                                                                                                                                                                                                                                                                                                                                                                                                            |
| <p>Study Procedures</p>     | <ul style="list-style-type: none"> <li>• Participants were instructed to provide a saliva sample by allowing saliva to collect in the mouth and gently expelling saliva into the collection tube. Sample donors then capped their tube. The participant handed the sample to the healthcare professional or collection site staff who placed the tube in a collection container.</li> <li>• The participant was asked survey questions about their symptoms.</li> <li>• The healthcare professional collected the mid-turbinate or nasopharyngeal sample and transferred the swab into the collection media (per the comparator manufacturer’s instructions).</li> <li>• Both samples were transported (via ground) to the testing location. All saliva samples were tested at the UIUC CLIA-certified lab on the candidate test; all swabs were transported by ground to the University of Illinois Chicago Hospital where they were tested with the Abbott RealTime SARS-CoV-2 assay performed on the Abbott m2000 System.</li> </ul> |
| <p>Statistical Analysis</p> | <ul style="list-style-type: none"> <li>• Positive percent agreement (PPA) and negative percent agreement (NPA) were determined by comparing results from the candidate test with those from the comparator test.</li> </ul>                                                                                                                                                                                                                                                                                                                                                                                                                                                                                                                                                                                                                                                                                                                                                                                                             |

**Supplementary Table 6. Details to Capture on Case Report Form**

|                                     |                                                                                                                                                                                                                                                                                                                                                                                                                                                                                                                                                                                                                                                                                                                                                                                                                                                                                                                                                                                                                                                                                                                                                                                                                                                                                                                                                                                                                                                                                                       |
|-------------------------------------|-------------------------------------------------------------------------------------------------------------------------------------------------------------------------------------------------------------------------------------------------------------------------------------------------------------------------------------------------------------------------------------------------------------------------------------------------------------------------------------------------------------------------------------------------------------------------------------------------------------------------------------------------------------------------------------------------------------------------------------------------------------------------------------------------------------------------------------------------------------------------------------------------------------------------------------------------------------------------------------------------------------------------------------------------------------------------------------------------------------------------------------------------------------------------------------------------------------------------------------------------------------------------------------------------------------------------------------------------------------------------------------------------------------------------------------------------------------------------------------------------------|
| Testing of External Controls        | <p>Candidate Assay:</p> <p>For every test run performed, a known positive and negative control was included in the covidSHELD test's reaction plate, as well as internal controls for each sample. The negative control consisted of UltraPure DNase- and RNase-free water, in order to evaluate cross-contamination between loading samples into the 384-well reaction plate. The positive control consisted of the Thermo Fisher TaqPath COVID-19 Combo Kit provided positive control, in order to evaluate the RT-qPCR reagents (primers, probes, Master Mix) and the ability of the QuantStudio 4, 7 Flex, and 7 Pro systems to detect viral genes. The internal control consisted of the Thermo Fisher TaqPath COVID-19 Combo Kit provided MS2, which was spiked into the MasterMix reaction, in order to evaluate if material within the saliva interfered with the detection of viral RNA by RT-qPCR. Controls were included on every plate. Beckman Biomek i5 Span8 and Multichannel robotics were used to transfer samples for some of the tests; for other tests, samples were transferred via manual pipetting.</p> <p>The test results were evaluated according to the interpretation tables in the EUA Summary (<a href="https://www.fda.gov/media/146317/download">https://www.fda.gov/media/146317/download</a>).</p> <p>Comparator Assay:</p> <p>The control protocol was followed according to standard practice in the clinical laboratory and per manufacturer's instructions.</p> |
| Sample Storage for candidate device | <p>Saliva samples were stored and/or shipped at room temperature for no longer than 7 days in the capped sample collection tube prior to testing.</p>                                                                                                                                                                                                                                                                                                                                                                                                                                                                                                                                                                                                                                                                                                                                                                                                                                                                                                                                                                                                                                                                                                                                                                                                                                                                                                                                                 |

**Supplementary Table 7. Comparison of mid-turbinate (MT) swab and saliva from 17 individuals identified with low viral load based on MT swab analyzed using Abbott Alinity RT-PCR.**

| Sample # | Mid-turbinate swab |          | Saliva       |           |                       |              |
|----------|--------------------|----------|--------------|-----------|-----------------------|--------------|
|          | Alinity Ct         | Result   | S-gene Ct    | N-gene Ct | <i>ORF1ab</i> gene Ct | Result       |
| 1        | 32.83              | positive | 34.07        | 33.39     | 35.19                 | positive     |
| 2        | 36.41              | positive | 33.14        | 31.68     | 32.72                 | positive     |
| 3        | 35.91              | positive | 29.49        | 28.94     | 29.7                  | positive     |
| 4        | 40.13              | positive | 34.61        | 32.19     | 34.71                 | positive     |
| 5        | 39.97              | positive | 30.52        | 29.82     | 30.59                 | positive     |
| 6        | 38.63              | positive | 35.09        | 33.68     | 35.27                 | positive     |
| 7        | 37.45              | positive | 34.66        | 33.12     | 33.94                 | positive     |
| 8        | 37.04              | positive | 33.87        | 32.2      | 33.26                 | positive     |
| 9        | 35.66              | positive | 27.19        | 25.79     | 27.38                 | positive     |
| 10       | 37.68              | positive | 35.17        | 34.77     | 37.61                 | positive     |
| 11       | 37.74              | positive | 34.99        | 33.81     | 34.65                 | positive     |
| 12       | 40.47              | positive | 33.93        | 33.99     | 36.53                 | positive     |
| 13       | 33.36              | positive | undetermined | 36.26     | undetermined          | inconclusive |
| 14       | 32.48              | positive | 21.75        | 21.34     | 21.37                 | positive     |
| 15       | 32.48              | positive | 28.17        | 27.72     | 28.23                 | positive     |
| 16       | 41.73              | positive | 35.95        | 34.23     | undetermined          | positive     |
| 17       | 39.83              | positive | 37.41        | 39.66     | 36.55                 | positive     |

**Supplementary Table 8. Quanta emission rates, and ventilation rates in different zone types. How many zones in each type is given in the “Count” column.**

| Zone type    | Count | $E_i$<br>( <i>quanta/hour</i> ) | $r_{vent}$<br>( <i>hour<sup>-1</sup></i> ) |
|--------------|-------|---------------------------------|--------------------------------------------|
| Bar          | 20    | 150                             | 15                                         |
| Restaurant   | 200   | 20                              | 10                                         |
| Cafe         | 50    | 15                              | 10                                         |
| Library      | 50    | 4                               | 3.5                                        |
| Classroom    | 790   | Professor<br>:100               | 3.5                                        |
|              |       | Student:4                       |                                            |
| Dorm         | 300   | 4                               | 3.5                                        |
| Dorm parties | 300   | 150                             | 3.5                                        |

**Supplementary Table 9: Assumption for how long agents stay in different zones.**

| Zone type  | Time Interval | Time Distribution |
|------------|---------------|-------------------|
| Home/Dorm  | 1h to 8h      | Uniform           |
| Library    | 1h to 7h      | Uniform           |
| Cafe       | 0.5h to 4h    | Uniform           |
| Bar        | 2h to 9h      | Uniform           |
| Dorm party | 2h            | exact 2 hours     |
